# Supplementary material for: Bergamot Polyphenolic Extract Combined with Albedo and Pulp Fibres Counteracts Changes in Gut Microbiota Associated with High-Fat Diet: Implications for Lipoprotein Size Re-Arrangement
Source: MDPI journal article supplement (doi:10.3390/ijms241612967), 2023-08-19
Supplement: s1 [file s1]

## Gradient hplc method

| S. No. | Step          | time (min) | Flow<br>(mL/min) | Eluent A (%) | Eluent B (%) |
|--------|---------------|------------|------------------|--------------|--------------|
| 0      | Equilibration | 7          | 1.1              | 15           | 85           |
| 1      | Run           | 4          | 1.1              | 22           | 78           |
| 2      | Run           | 8          | 1.1              | 22           | 78           |
| 3      | Run           | 4          | 1.1              | 60           | 40           |
| 4      | Run           | 1          | 1.1              | 100          | 0            |
| 5      | Run           | 1          | 1.1              | 100          | 0            |
| 6      | Run           | 1          | 1.1              | 10           | 90           |
| 7      | Washing       | 1          | 1.1              | 10           | 90           |

Eluent A: Acetonitrile

Eluent B: 0.88% Trifluoroacetic acid

**Linear regression:  $y = 2726X - 2256$**

|       |           |
|-------|-----------|
| Slope | Y interc. |
| 2726  | 2256      |

| Naringin content in BPE sample |             |             |             |             |             |
|--------------------------------|-------------|-------------|-------------|-------------|-------------|
|                                | Replicate 1 | Replicate 2 | Replicate 3 | Replicate 4 | Replicate 5 |
| Area                           | 1333599,6   | 1312074,7   | 1313010,8   | 1313180,7   | 1311907,6   |
| Conc. (mg/L)                   | 488,3872    | 480,4911    | 480,8345    | 480,8968    | 480,4298    |

| Naringin content in test for accuracy |          |              |           |             |
|---------------------------------------|----------|--------------|-----------|-------------|
|                                       |          | Replicate 1  |           | Replicate 2 |
| % of target                           | 95,6%    | Area         | 1278226,5 | 1265481,4   |
| Conc. (mg/L)                          | 461,2827 | Conc. (mg/L) | 468,0743  | 463,3989    |

| Naringin content in test for accuracy |          |              |           |             |
|---------------------------------------|----------|--------------|-----------|-------------|
|                                       |          | Replicate 1  |           | Replicate 2 |
| % of target                           | 116,3%   | Area         | 1496949,1 | 1498968,1   |
| Conc. (mg/L)                          | 561,2827 | Conc. (mg/L) | 548,3100  | 549,0507    |

|             | Average Area | Standard Deviation | RSD (%) |
|-------------|--------------|--------------------|---------|
| Replicate 6 |              |                    |         |
| 1322601,6   |              |                    |         |
| 484,3528    | 482,5654     | 3,22               | 0,67%   |

|             | Average Area | Standard Deviation | RSD (%) | Recovery (%) |
|-------------|--------------|--------------------|---------|--------------|
| Replicate 3 |              |                    |         |              |
| 1267612,9   |              |                    |         |              |
| 464,1808    | 465,2180     | 2,50               | 0,54%   | 100,85%      |

|             | Average Area | Standard Deviation | RSD (%) | Recovery (%) |
|-------------|--------------|--------------------|---------|--------------|
| Replicate 3 |              |                    |         |              |
| 1495493,9   |              |                    |         |              |
| 547,7762    | 548,3790     | 0,64               | 0,12%   | 97,70%       |
