# Supplementary material for: Bergamot Polyphenolic Extract Combined with Albedo and Pulp Fibres Counteracts Changes in Gut Microbiota Associated with High-Fat Diet: Implications for Lipoprotein Size Re-Arrangement
Source: MDPI journal article supplement (doi:10.3390/ijms241612967), 2023-08-19
Supplement: s1 [file s1]

**SPECIFICATION SHEET**

|                                                                                                  |                                |                        |
|--------------------------------------------------------------------------------------------------|--------------------------------|------------------------|
| <b>ID Code</b>                                                                                   | <b>BRGFBRDC</b>                |                        |
| <b>Trade name</b>                                                                                | <b>BERGAMOT FIBER</b>          |                        |
| <b>DESCRIPTION</b>                                                                               | <b>SPECIFICATIONS</b>          |                        |
| Botanical Source                                                                                 | Citrus Bergamia Risso et Poit. |                        |
| Family                                                                                           | Rutaceae                       |                        |
| Country of Origin                                                                                | Calabria, Italy                |                        |
| Part Used                                                                                        | Fruit                          |                        |
| Shelf Life                                                                                       | 2 years, if correctly stored   |                        |
| <b>ORGANOLEPTIC CHARACTERISTICS</b>                                                              | <b>SPECIFICATIONS</b>          |                        |
| Colour                                                                                           | Yellow Powder                  | visual (CQ-MO-148)     |
| Odour                                                                                            | Aromatic                       | visual (CQ-MO-148)     |
| Flavour                                                                                          | Characteristic of bergamot     | sensory (CQ-MO-148)    |
| <b>CHEMICAL CHARACTERISTICS</b>                                                                  | <b>SPECIFICATIONS</b>          | <b>METHOD</b>          |
| Appearance                                                                                       | Powder                         |                        |
| Mesh Size                                                                                        | Pass 50 mesh                   | Sieve: (CQ-MO-023)     |
| Tapped Density                                                                                   | 50 - 70 g/100mL                | PT CHIM 65 rev 0 2011  |
| Moisture Content                                                                                 | < 10.0%                        | ISTISAN 96/34, pag 7   |
| Organic Solvent Residue                                                                          | Complies with Dir. 2009/32/CE  | GC: (CQ-MO-168)        |
| Pesticides Residue                                                                               | Complies with Reg. UE 839/2008 | PT CHIM 69rev 02 011   |
| Pectin                                                                                           | > 15.0%                        | IM                     |
| Tot. active ingredient strength (Neoeriocitrin, Naringin, Neohesperedin, Melitidin, Brutieridin) | > 1.5 %                        | HPLC                   |
| <b>HEAVY METALS</b>                                                                              | <b>UNIT</b>                    | <b>RANGE</b>           |
| Arsenic                                                                                          | mg/kg                          | <1.0                   |
| Lead                                                                                             | mg/kg                          | <0.5                   |
| Cadmium                                                                                          | mg/kg                          | <0.5                   |
| Mercury                                                                                          | mg/kg                          | <0.3                   |
| <b>MICROBIOLOGICAL EVALUATION</b>                                                                |                                |                        |
| Aerobic Plate Count                                                                              | <10,000 CFU/g                  | ISO 4833-1:2013        |
| Yeast and Mold Count                                                                             | <1,000 CFU/g                   | ISO 21527-1:2008       |
| E. Coli                                                                                          | Negative                       | ISO 16694-2:2001       |
| Coliform                                                                                         | Negative                       | ISO 4832:2006          |
| Salmonella                                                                                       | Negative                       | UNI EN ISO 6579:2000   |
| Staphylococcus Aureus                                                                            | Negative                       | UNI EN ISO 6888-2:2004 |
| Streptococci                                                                                     | Negative                       | PT BAT26 rev0 02012    |
| <b>PRODUCT TREATMENT</b>                                                                         |                                |                        |
| Drying Method                                                                                    | Hot air                        |                        |

**Bergamot Fiber**

***NUTRITIONAL FACTS***

|                             |                        |
|-----------------------------|------------------------|
| <b>PRODUCT NAME:</b>        | <b>Bergamot Fiber</b>  |
| <b>IDENTIFICATION CODE:</b> | <b>BRGFBRDC</b>        |
| <b>NUTRIENTS</b>            | <b>AMOUNT per 100g</b> |
| Calorific Value (kcal)      | <b>150 - 400</b>       |
| Fat (%)                     | <b>&lt; 3.0</b>        |
| Ash (%)                     | <b>&lt; 7.0</b>        |
| Total Carbohydrates (%)     | <b>&gt; 40.0</b>       |
| Protein (%)                 | <b>&lt; 10.0</b>       |
| Water (%)                   | <b>&lt; 10.0</b>       |

**RECOMMENDED STORAGE CONDITIONS:**

Store in a fresh and dry place, repaired from light and humidity sources.

**BEST BEFORE:**

24 months under the previously mentioned conditions and in its original packaging.

**PACKAGING:**

15 kg bags.



H&ad srl analytical chemistry & processes  
E-mail : [g.trunfio@head-sa.com](mailto:g.trunfio@head-sa.com)

# SAMPLE REPORT

Acquisition Date/Time 14-Oct-22 09:27:10  
 Acquisition Method Flavonoids ca. on Naringin\_March22  
 Chromera Version 4.2.0.6415  
 Dilution Factor 21  
 Report Date/Time 19-Oct-22 10:59:44  
 Sample Name Bergamot Fiber Lot. 1402-22  
 Vial Number 53

Bergamot Fiber Lot. 1402-22 : 284:10:400:10 : 1

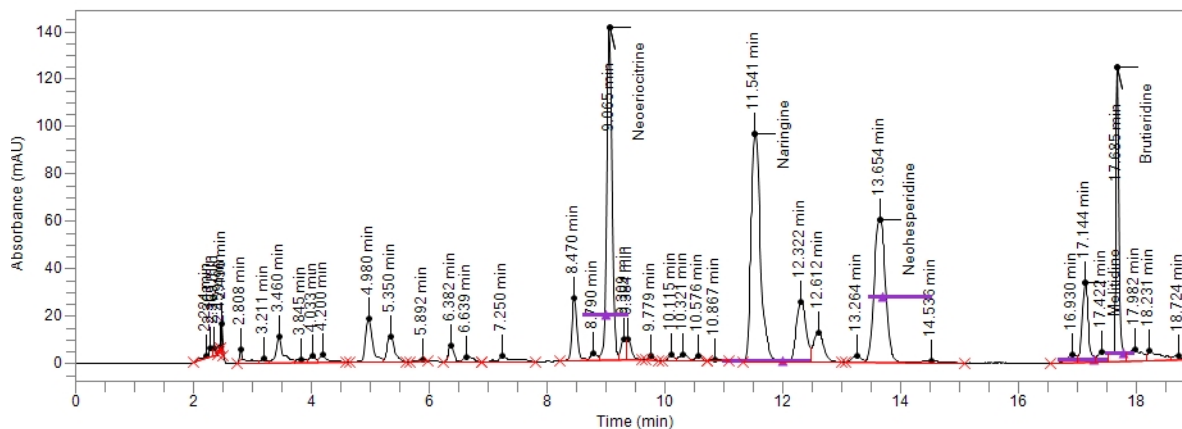

| Peak #       | Time   | Component Name | Area        | Height    | Final Amount | Units |
|--------------|--------|----------------|-------------|-----------|--------------|-------|
| 37           | 17.685 | Brutieridine   | 460,428.7   | 124,257.2 | 2,286.9272   | ppm   |
| 35           | 17.144 | Melitidine     | 240,632.0   | 33,864.1  | 1,233.3295   | ppm   |
| 28           | 11.541 | Naringine      | 1,064,965.6 | 96,201.0  | 5,184.8012   | ppm   |
| 20           | 9.065  | Neoeriocitrine | 900,833.9   | 140,543.2 | 4,398.0290   | ppm   |
| 32           | 13.654 | Neohesperidine | 810,831.1   | 60,168.6  | 3,966.5970   | ppm   |
| <b>Total</b> |        |                | 3,477,691.3 |           | 17,069.6840  |       |

# SAMPLE REPORT

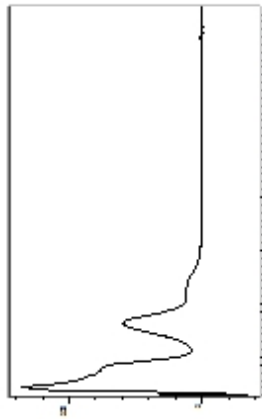

Peak: 20, 9.065min, Neohesperidine

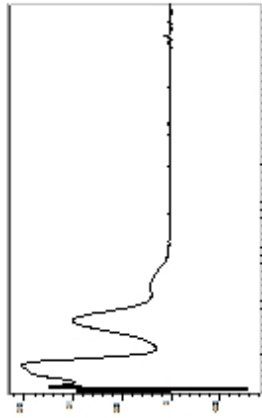

Peak: 28, 11.541min, Naringine

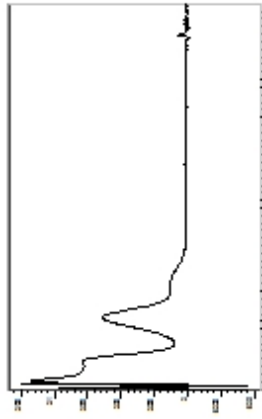

Peak: 32, 13.654min, Neohesperidine

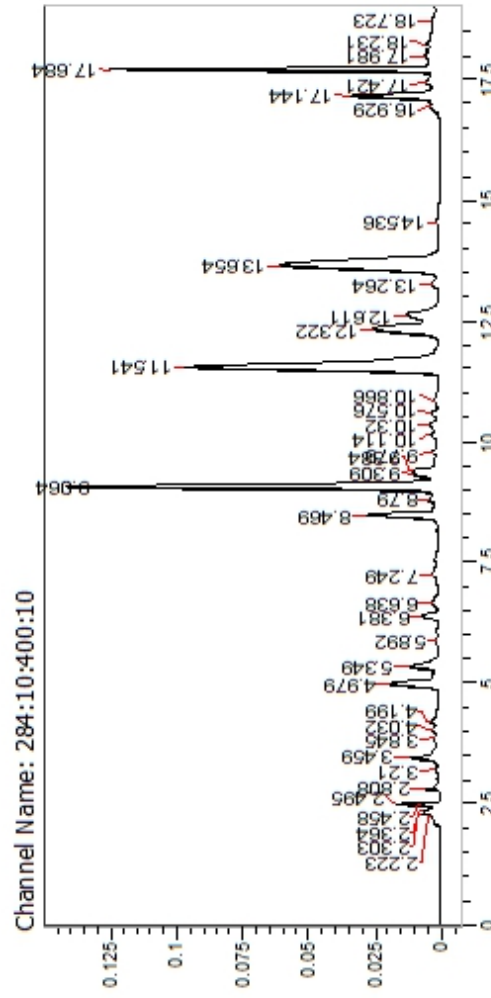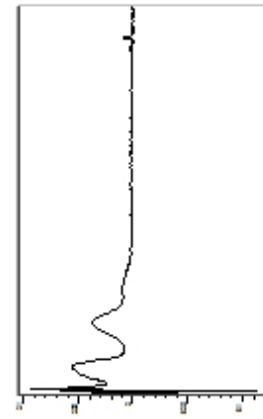

Peak: 35, 17.144min, Melitidine

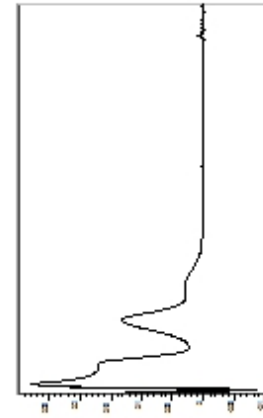

Peak: 37, 17.685min, Brutieridine

**SAMPLE REPORT**

Approved: \_\_\_\_\_  
Signature: \_\_\_\_\_ Name: \_\_\_\_\_ Date: \_\_\_\_\_
