# Supplementary material for: Bergamot Polyphenolic Extract Combined with Albedo and Pulp Fibres Counteracts Changes in Gut Microbiota Associated with High-Fat Diet: Implications for Lipoprotein Size Re-Arrangement
Source: MDPI journal article supplement (doi:10.3390/ijms241612967), 2023-08-19
Supplement: s1 [file s1]

# SAMPLE REPORT

Acquisition Date/Time 08-Apr-21 09:41:18  
 Acquisition Method Flavonoids cal. on Naringin  
 Chromera Version 4.2.0.6415  
 Dilution Factor 300  
 Report Date/Time 08-Apr-21 10:01:28  
 Sample Name BPE Lot 0403-21  
 Vial Number 93

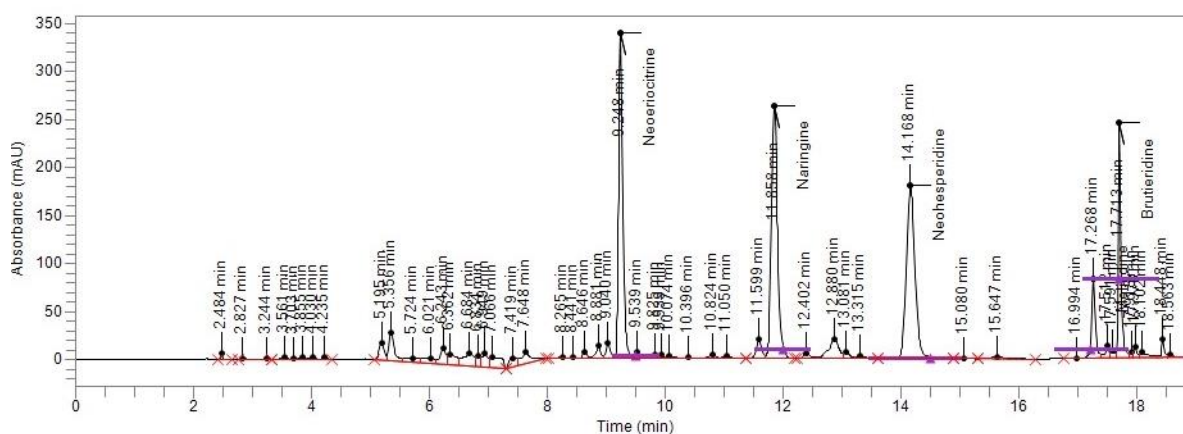

| Peak #       | Time   | Component Name | Area        | Height    | Final Amount | Units |
|--------------|--------|----------------|-------------|-----------|--------------|-------|
| 47           | 17.713 | Brutieridine   | 656,827.3   | 246,131.4 | 56,496.8320  | µg/g  |
| 44           | 17.268 | Melitidine     | 349,250.1   | 83,830.6  | 27,950.9345  | µg/g  |
| 35           | 11.858 | Naringine      | 1,874,484.3 | 263,414.2 | 138,945.5648 | µg/g  |
| 26           | 9.248  | Neoeriocitrine | 1,618,264.9 | 340,179.9 | 131,942.1912 | µg/g  |
| 40           | 14.168 | Neohesperidine | 1,838,350.9 | 180,787.0 | 134,617.2130 | µg/g  |
| <b>Total</b> |        |                | 6,337,177.4 |           | 489,952.7356 |       |

Approved:

Signature: \_\_\_\_\_ Name: \_\_\_\_\_ Date: \_\_\_\_\_

**Bergamot Polyphenolic Extract (BPE)**

**SPECIFICATION SHEET**

|                                                                                                  |                                            |                            |
|--------------------------------------------------------------------------------------------------|--------------------------------------------|----------------------------|
| <b>ID Code</b>                                                                                   | <b>BRGESTPG</b>                            |                            |
| <b>Trade name</b>                                                                                | <b>BERGAMOT POLYPHENOLIC EXTRACT (BPE)</b> |                            |
| <b>DESCRIPTION</b>                                                                               | <b>SPECIFICATIONS</b>                      |                            |
| Botanical Source                                                                                 | Citrus Bergamia Risso et Poit.             |                            |
| Family                                                                                           | Rutaceae                                   |                            |
| Synonyms                                                                                         | Citrus aurantium var. bergamia             |                            |
| Country of Origin                                                                                | Calabria, Italy                            |                            |
| Part Used                                                                                        | Fruit Juice                                |                            |
| Shelf Life                                                                                       | 4 years, if correctly stored               |                            |
| <b>ORGANOLEPTIC CHARACTERISTICS</b>                                                              | <b>SPECIFICATIONS</b>                      |                            |
| Colour                                                                                           | Yellow Powder                              | visual (CQ-MO-148)         |
| Odour                                                                                            | Aromatic                                   | visual (CQ-MO-148)         |
| Flavour                                                                                          | Characteristic of bergamot                 | sensory (CQ-MO-148)        |
| <b>CHEMICAL CHARACTERISTICS</b>                                                                  | <b>SPECIFICATIONS</b>                      | <b>METHOD</b>              |
| pH                                                                                               | 3.0 – 4.0                                  | IM (0.5% in water at 25°C) |
| Average Mesh Size                                                                                | Pass 60 mesh                               | Sieve: (CQ-MO-023)         |
| Bulk Density                                                                                     | 40 - 60 g/100mL                            | PT CHIM 65 rev 0 2011      |
| Moisture Content                                                                                 | < 8.0%                                     | ISTISAN 96/34, pag 7       |
| Solubility in 40°C H <sub>2</sub> O                                                              | Good                                       | visual: (CQ-MO-148)        |
| Solubility in 50% H <sub>2</sub> O + EtOH                                                        | Good                                       | visual: (CQ-MO-148)        |
| Organic Solvent Residue                                                                          | Complies with Dir. 2009/32/CE              | GC: (CQ-MO-168)            |
| Pesticides Residue                                                                               | Complies with Reg. UE 839/2008             | PT CHIM 69rev 02 011       |
| Tot. active ingredient strength (Neoeriocitrin, Naringin, Neohesperidin, Melitidin, Brutieridin) | > 47.0 %                                   | HPLC                       |
| <b>SINGLE COMPONENT MINIMUM TRESHOLD CONCENTRATION</b>                                           |                                            |                            |
| Neoeriocitrin                                                                                    | 9.0 %                                      |                            |
| Naringin                                                                                         | 11.0 %                                     |                            |
| Neohesperidin                                                                                    | 11.0 %                                     |                            |
| Melitidin                                                                                        | 1.0 %                                      |                            |
| Brutieridin                                                                                      | 2.0 %                                      |                            |
| <b>HEAVY METALS</b>                                                                              | <b>UNIT</b>                                | <b>RANGE</b>               |
| Arsenic                                                                                          | mg/kg                                      | <1.0                       |
| Lead                                                                                             | mg/kg                                      | <0.5                       |
| Cadmium                                                                                          | mg/kg                                      | <0.5                       |
| Mercury                                                                                          | mg/kg                                      | <0.3                       |
| <b>MICROBIOLOGICAL EVALUATION</b>                                                                |                                            |                            |
| Aerobic Plate Count                                                                              | <1,000 CFU/g                               | ISO 4833-1:2013            |
| Yeast and Mold Count                                                                             | <100 CFU/g                                 | ISO 21527-1:2008           |
| E. Coli                                                                                          | Negative                                   | ISO 16694-2:2001           |
| Coliform                                                                                         | Negative                                   | ISO 4832:2006              |
| Salmonella                                                                                       | Negative                                   | UNI EN ISO 6579:2000       |
| Staphylococcus Aureus                                                                            | Negative                                   | UNI EN ISO 6888-2:2004     |
| Streptococci                                                                                     | Negative                                   | PT BAT26 rev0 02012        |
| <b>PRODUCT TREATMENT</b>                                                                         |                                            |                            |
| Drying Method                                                                                    | <b>Spray dry</b>                           |                            |

**Herbal &Antioxidant Derivatives S.r.l. (H&AD S.r.l.)**

Headquarters: Località Chiusi - 89032 BIANCO (RC), ITALY

Tel. +39 0964 913405 E-mail: info@head-sa.com Website: <http://www.head-sa.com/>

CF/PI- 02543180802

**Bergamot Polyphenolic Extract (BPE)**

**NUTRITIONAL FACTS**

|                             |                        |
|-----------------------------|------------------------|
| <b>PRODUCT NAME:</b>        | <b>BPE</b>             |
| <b>IDENTIFICATION CODE:</b> | <b>BRGESTPG</b>        |
| <b>NUTRIENTS</b>            | <b>AMOUNT per 100g</b> |
| Calorific Value (kcal)      | <b>300 - 450</b>       |
| Fat (%)                     | <b>&lt; 1.0</b>        |
| Ash (%)                     | <b>&lt; 7.0</b>        |
| Total Carbohydrates (%)     | <b>&gt; 80.0</b>       |
| Protein (%)                 | <b>&lt; 2.5</b>        |
| Water (%)                   | <b>&lt; 8.0</b>        |

**RECOMMENDED STORAGE CONDITIONS:**

Store in a fresh and dry place, repaired from light and humidity sources.

**BEST BEFORE:**

48 months under the previously mentioned conditions and in its original packaging.

**PACKAGING:**

20 kg fiber drums or 10 kg Aluminium bags.

*Giuseppe Trunfio*

H&ad srl analytical chemistry & processes  
E-mail : [g.trunfio@head-sa.com](mailto:g.trunfio@head-sa.com)
